1     **Integrated Omics Analysis Reveals Sirtuin Signaling is Central to Hepatic Response to a High**  
2                                                           **Fructose Diet**

3

4     Laura A. Cox<sup>1,2,3,4</sup>, Jeannie Chan<sup>1,2</sup>, Prahlad Rao<sup>5</sup>, Zeeshan Hamid<sup>1</sup>, Jeremy P. Glenn<sup>2,3</sup>, Avinash  
5     Jadhav<sup>1,2</sup>, Vivek Das<sup>6</sup>, Genesis M. Karere<sup>1,2</sup>, Ellen Quillen<sup>1,2</sup>, Kylie Kavanagh<sup>1,4</sup>, Michael Olivier<sup>1,2</sup>

6

7             <sup>1</sup>Center for Precision Medicine, Department of Internal Medicine, Section on Molecular Medicine,  
8     Wake Forest School of Medicine, Winston-Salem, NC 27157, USA.

9             <sup>2</sup>Department of Genetics, Texas Biomedical Research Institute, San Antonio, TX 78245, USA.

10            <sup>3</sup>Southwest National Primate Research Center, Texas Biomedical Research Institute, San  
11     Antonio, TX 78245, USA.

12            <sup>4</sup>Department of Pathology, Section on Comparative Medicine, Wake Forest School of Medicine,  
13     Winston-Salem, NC 27157, USA.

14            <sup>5</sup> University of Tennessee Health Science Center, Memphis TN

15            <sup>6</sup> Novo Nordisk Research Center, Seattle, WA, USA.

16

17     **Short title:** Integrated omics of hepatic response to high fructose

18

19     **Corresponding author:**

20     Laura A. Cox, Ph.D.

21     Center for Precision Medicine

22     NRC, G-floor

23     Medical Center Boulevard

24     Winston-Salem, NC 27157, USA

25

26     Phone: 336-713-7506

27 e-mail: laurcox@wakehealth.edu

## 28 **Abstract**

### 29 Background

30 Dietary high fructose (HFr) is a known metabolic disruptor contributing to development of obesity and  
31 diabetes in Western societies. Initial molecular changes from exposure to HFr on liver metabolism may  
32 be essential to understand the perturbations leading to insulin resistance and abnormalities in lipid and  
33 carbohydrate metabolism. We studied vervet monkeys (*Chlorocebus aethiops sabaues*) fed a HFr (n=5)  
34 or chow diet (n=5) for 6 weeks, and obtained clinical measures of liver function, blood insulin, cholesterol  
35 and triglycerides. In addition, we performed untargeted global transcriptomics, proteomics, and  
36 metabolomics analyses on liver biopsies to determine the molecular impact of a HFr diet on coordinated  
37 pathways and networks that differed by diet.

38

### 39 Results

40 We show that integration of omics data sets improved statistical significance for some pathways and  
41 networks, and decreased significance for others, suggesting that multiple omics datasets enhance  
42 confidence in relevant pathway and network identification. Specifically, we found that sirtuin signaling  
43 and a peroxisome proliferator activated receptor alpha (PPARA) regulatory network were significantly  
44 altered in hepatic response to HFr. Integration of metabolomics and miRNAs data further strengthened  
45 our findings.

46

### 47 Conclusions

48 Our integrated analysis of three types of omics data with pathway and regulatory network analysis  
49 demonstrates the usefulness of this approach for discovery of molecular networks central to a biological  
50 response. In addition, metabolites aspartic acid and docosahexaenoic acid (DHA), protein ATG3, and  
51 genes *ATG7*, *HMGCS2* link sirtuin signaling and the PPARA network suggesting molecular mechanisms  
52 for altered hepatic gluconeogenesis from consumption of a HFr diet.

53

54 **Keywords:** integrated omics, transcriptomics, proteomics, metabolomics, miRNA, liver metabolism, diet,  
55 vervet, pathway analysis.

56

57

## 58 **BACKGROUND**

59 Fructose intake in countries where people consume a Western diet has significantly increased over the  
60 past three decades, particularly through increased consumption of sweetened beverages and foods  
61 containing high-fructose corn syrup. Fructose consumption comprises a significant proportion of energy  
62 intake in the American diet, and increased consumption coincides with increased prevalence of obesity  
63 over the past three decades (1). Animal studies have shown that diets high in fructose consistently induce  
64 metabolic perturbations associated with metabolic syndrome and diabetes (1, 2). Altered metabolism in  
65 the liver has been implicated in multiple chronic metabolic diseases (3). Several studies have investigated  
66 HFr diet challenges in humans (4, 5) and nonhuman primates (NHP) (6-9). In cynomolgus monkeys  
67 (*Macaca fascicularis*), long-term exposure to high fructose (HFr) diets increased liver steatosis, with  
68 extent related to duration of fructose exposure (10), but questions remain about the initial molecular  
69 changes induced by high levels of fructose that result in long-term health complications.

70

71 The vervet monkey (*Chlorocebus aethiops sabaesus*) is a model for multiple human complex diseases  
72 including neurodegenerative disease (11), Alzheimer's disease (12-15), diabetes, obesity and  
73 metabolism (16-18) and cardiovascular disease (19, 20) among others. Due to the high degree of  
74 genomic (21-23), physiologic and metabolic conservation between vervets and humans, results in vervets  
75 are translatable to understanding human health and disease. The ability to control environmental factors  
76 including diet and feasibility of collecting tissue biopsy samples from healthy animals, provide  
77 opportunities to investigate molecular mechanisms that are dysregulated prior to evidence of clinical  
78 disease. Studies in vervets related to metabolism have included diet interventions with variation in

79 sources of protein, fat, and carbohydrate (18, 24, 25); However, none of these studies in humans or NHP  
80 have used global untargeted omics approaches to identify potential molecular mechanisms underlying  
81 diet-induced changes in liver metabolism. In addition, no studies to date have generated an integrated  
82 comprehensive multi-omics dataset to better understand these molecular changes (26).

83

84 The goal of this study included examination of the impact of a short-term exposure to a HFr diet in the  
85 liver, a key organ mediating carbohydrate and lipid metabolism, by integrating high-throughput omics  
86 data and investigating the benefits of data integration across multiple omics domains. The short-term HFr  
87 diet exposure has no discernible impact on body weight, insulin sensitivity, blood pressure, or  
88 triglycerides. Total plasma cholesterol and measures of liver injury were greater in animals fed the HFr  
89 diet than controls. We examined whether early molecular alterations in liver can be detected prior to  
90 development of obesity and diabetes. We compared transcriptome, proteome, and metabolome data  
91 from livers of vervets challenged with a HFr diet for six weeks with those fed a chow diet. We demonstrate  
92 that the molecular information obtained from integrated analysis of multi-omics datasets is more  
93 informative than analyses of any of the individual omics datasets. In addition, using this integrated omics  
94 approach, we identified sirtuin signaling and a peroxisome proliferator activated receptor alpha (PPARA)  
95 regulatory network as central to the hepatic short-term response to a HFr diet. Metabolites aspartic acid  
96 and DHA provide direct evidence on alterations in liver metabolism, and connect sirtuin signaling pathway  
97 and PPARA regulatory network, suggesting perturbations in these molecular mechanisms underlie  
98 altered hepatic gluconeogenesis in response to a short-term HFr diet.

99

## 100 **RESULTS**

101

### 102 **Clinical and Morphometric Data Analysis**

103 Female age-matched vervet monkeys were fed a chow diet (controls, n=5) or a HFr diet (n=5) for six  
104 weeks. Morphometric measures at the end of challenge were not different between groups. Total plasma  
105 cholesterol was increased, and measures of liver injury, alanine aminotransferase, alkaline phosphatase,

106 and gamma-glutamyl transpeptidase were increased in animals fed the HFr diet compared to controls  
107 (Table 1).

108

### 109 **Transcriptomics Data Analysis**

110 Comprehensive analysis of RNA expression has commonly been used to study the influence of genetic  
111 factors on phenotypic variation and is often used as a surrogate measure for functional alterations  
112 (potentially mediated by proteins or by alterations in metabolite levels). As a first step of our multi-omics  
113 characterization of liver biopsies from animals in this study, we performed RNA-Seq analyses on all  
114 samples. We identified 10,688 transcripts that passed quality filters. Of these, 467 were differentially  
115 expressed between liver samples from animals fed HFr and chow diets (unadjusted  $p < 0.05$ ) (Additional  
116 file 3). Pathway enrichment analysis revealed that 51 pathways were different between HFr and chow  
117 including sirtuin signaling, remodeling of epithelial adherens junctions signaling, and necroptosis  
118 signaling ( $p$ -value  $< 0.05$ , Table 2, Additional files 1 and 4). Regulatory network analysis resulted in 5  
119 networks with predicted activation states. Four networks regulated by XBP1, PPARA, MITF, and KLF15  
120 were predicted to activate downstream targets, and one network regulated by HDAC1 was predicted to  
121 inhibit downstream targets ( $p$ -value  $< 0.05$ ) (Table 3, Additional files 2 and 5). Regulators XBP1, PPARA,  
122 MITF, KLF15, and HDAC1 were expressed but not different between liver samples from HFr and chow-  
123 fed animals.

124

### 125 **Proteomics Data Analysis**

126 We analyzed liver-extracted proteins using standard mass spectrometry approaches as reported  
127 previously (27). Overall, we were able to identify 2858 proteins across the 10 samples. Of these, 1594  
128 proteins were identified in at least 3 of 5 samples from either the chow- or the HFr-fed animals, and 1172  
129 proteins were identified in samples from at least 3 animals in each group. We included further analyses  
130 the 1172 proteins plus 70 proteins that passed quality filters for all samples in one group, but were not  
131 found in any of the samples of the other group. Of the combined 1242 proteins that passed these filters,  
132 126 proteins were quantitatively different between liver samples from HFr- and chow-fed animals ( $p$ -value

133 < 0.05) (Additional file 6). Pathway enrichment analysis revealed 58 pathways altered by HFr and  
134 included pathways that were also observed from the transcriptomic data, including sirtuin signaling, and  
135 remodeling of epithelial adherens junctions signaling ( $p$ -value < 0.05, Table 2, Additional file 7). No  
136 regulatory networks were found with a predicted activation state (Table 3, Additional file 8). Network  
137 regulators XBP1, PPARA, MITF, KLF15, and HDAC1 were not detected in the proteomic analysis.

138

### 139 **Commonalities between Gene and Protein Expression**

140 Comparison of gene and protein expression showed 320 molecules with greater expression and 263 with  
141 reduced expression that were common to both the transcriptomics and proteomics analyses in liver  
142 samples from animals fed a HFr diet compared to chow-fed animals. Comparison of statistically  
143 significant differentially expressed genes and proteins revealed only 2 shared molecules, SLCO1B1 and  
144 HTATIP2, with decreased abundance in livers from HFr-fed animals compared to chow-fed animals  
145 (Figure 1, Additional file 9).

146

### 147 **Metabolomics Data Analysis**

148 To examine whether we could expand on the molecular changes induced in the liver by HFr exposure  
149 that we uncovered by gene-centric analyses (transcriptomics, proteomics), we performed untargeted  
150 analysis of small molecule metabolites to analyze the metabolomic changes. Overall, we quantified 471  
151 metabolites that passed quality filters. Of these, 18 showed significantly different abundances between  
152 liver samples from HFr- and chow-fed animals ( $p$ -value < 0.05, Additional file 10). Pathway enrichment  
153 showed 25 pathways including aspartate biosynthesis. Sirtuin signaling was observed but not significant  
154 ( $p$ -value = 0.089, Table 2 and Additional file 11). All pathways identified in the enrichment analysis only  
155 contained one single metabolite per pathway, highlighting the limited annotation of metabolites in  
156 pathways and networks. No regulatory networks were found with a predicted activation state and  $p$ -value  
157 < 0.05 (Table 3, Additional file 12).

158

### 159 **Integrated Omics Analysis**

160 Using the datasets described above, we further assessed whether combinations of omics datasets  
161 improved statistical confidence and significance in the network and pathway enrichment findings. First,  
162 we examined the combination of the gene expression and proteomics results. Integrated analysis of  
163 transcriptomic and proteomic data revealed 51 significantly enriched pathways ( $p$ -value < 0.05).  
164 Statistical significance of sirtuin signaling, remodeling of epithelial adherens junctions, necroptosis  
165 signaling, and regulatory cell mechanics by calpain protease increased, and the number of molecules  
166 identified in each network increased with dataset integration. Interestingly, for sirtuin signaling, the  
167 number of genes and proteins was greater than the sum of genes and proteins from individual omic  
168 pathway analysis; this is due to our requirement for direct connections with addition of protein data to  
169 gene data connecting additional genes in the pathway. Significance of some pathways decreased, such  
170 as stearate biosynthesis, cell cycle control of chromosomal replication, and cholesterol biosynthesis  
171 (Table 2, Additional files 1 and 13). Integrated analysis showed 4 activated networks with predicted  
172 regulators PPARA, XBP1, MITF, and KLF15, and one inhibited network with predicted regulator HDAC1.  
173 Statistical significance increased and the number of molecules in the networks increased for the PPARA  
174 and XBP1 networks when compared to the analysis of the transcriptomic data alone (Table 3, Additional  
175 files 2 and 14).

176

177 Integration of the transcriptomics and proteomics data with metabolomics findings further enhanced the  
178 pathway enrichment and network analyses, and resulted in the identification of 43 significantly enriched  
179 pathways. The significance of several pathways, and the number of molecules identified in each pathway,  
180 increased even more compared to the gene-protein integrated pathways, including again sirtuin signaling,  
181 remodeling of epithelial adherens junctions, necroptosis signaling, and regulatory cell mechanics by  
182 calpain protease. Sirtuin signaling had the greatest significance and the greatest number of identified  
183 molecules with genes, proteins and metabolites. In addition, significance of other pathways such as cell  
184 cycle control of chromosomal replication, and cholesterol biosynthesis further decreased again when  
185 compared to the gene-protein integrated networks (Table 2, Additional files 1 and 15). Integrated network  
186 analysis was similar to pathway analysis with increased significance and molecule number compared to

187 the gene-protein integrated networks, with the PPARA regulatory network (that included gene transcripts,  
188 proteins and metabolites) being the most significant (Table 3, Additional files 2 and 16). Of note, the  
189 protein FASN directly links regulatory networks PPARA, XBP1 and KLF15. In addition, overlapping  
190 molecules in networks link regulators PPARA and KLF15 with sirtuin signaling, including the protein  
191 ATG3, gene transcripts ATG7, HMGCS2, and metabolites DHA and L-aspartic acid (Figure 2).

192

### 193 **Integration of miRNA Data**

194 In an effort to explore putative regulatory mechanisms underlying the pathway and network enrichment  
195 we describe above, we integrated analysis data from small RNA-Seq (which characterizes miRNAs) with  
196 the multi-omics datasets described above. In our analysis, we identified 576 known miRNAs that passed  
197 quality filters. Of these, 22 were differentially expressed between liver samples from HFr- and chow-fed  
198 animals ( $p$ -value < 0.05, Additional file 17). Detailed miRNA – gene/protein pairing provided a list of 793  
199 inverse pairs that included 17 differentially expressed miRNAs and 758 differentially abundant genes or  
200 proteins (Additional file 18). Integration of miRNAs with pathways increased the number of molecules in  
201 remodeling of epithelial adherens junctions and necroptosis signaling, and the number of molecules  
202 increased for regulatory networks PPARA, XBP1, MITF and HDAC1 (Table 3, Additional file 2). In  
203 addition, these regulatory networks were interconnected by miRNAs that target genes and proteins in  
204 multiple networks: miR-148-3p for PPARA, MITF, KLF15, and XBP1 network genes and proteins, miR-  
205 181a-5p for MITF, KLF15, and XBP2 network genes and proteins, miR 342-5p for MITF, XBP1 and  
206 PPARA network genes and proteins, and miR-574-5p for XBP1 and MITF network genes and proteins  
207 (Figure 2). This integration suggests potential regulatory roles for these miRNAs in coordinating the  
208 molecular changes induced in the liver after exposure to a HFr diet, and emphasizes the complexity of  
209 miRNA interactions that may affect both transcript and protein levels.

210

### 211 **Genes and Proteins in Multi-Omic Networks with Associations to NASH- and NAFLD-Related** 212 **Traits**



213 To examine the potential shared pathophysiological mechanisms induced by short term HFr diet  
214 exposure with long-term liver health outcomes associated with HFr, we compared GWAS catalog variants  
215 and genes associated with nonalcoholic steatohepatitis (NASH)- and nonalcoholic fatty liver disease  
216 (NAFLD)-related traits, including BMI, lipoproteins, obesity, diabetes, insulin resistance, with the  
217 differentially expressed genes and proteins identified in our analysis of liver samples. The alignment of  
218 the datasets revealed 53 genes and proteins with one or more intergenic single nucleotide polymorphism  
219 (SNP) associated with one or more NASH/NAFLD related trait(s) (Additional file 19). When we restricted  
220 the analysis only to genes and proteins in significantly enriched multi-omic pathways and networks, we  
221 identified 13 genes with GWAS SNPs, including FABP1 (associated with NAFLD) in PPARA and HDAC1  
222 networks; GOT2 (associated with triglycerides and aspartate aminotransferase) in the sirtuin signaling  
223 pathway; and ATG7 (associated with fat body mass) in the sirtuin signaling pathway and KLF15 network  
224 (Table 4).

225

## 226 **DISCUSSION**

227 The liver is central to metabolic regulation, and dysregulation of liver metabolism directly impacts  
228 gluconeogenesis and lipogenesis. Exposure to a HFr diet is known to increase the risk of dyslipidemia,  
229 insulin resistance, lipogenesis (28), levels of hepatic oxidative stress markers, and induce NASH and  
230 NAFLD (6). Unlike glucose, fructose is absorbed in the intestine independently of energy or sodium  
231 exchange. When consumed in high amounts, fructose is transported to the liver via hepatic portal  
232 circulation and is preferentially converted to lipids. Fructose forms the building blocks of triglycerides (29),  
233 and triglycerides produced in the liver mostly are packaged into atherogenic very low-density lipoprotein  
234 particles (30). Fructose in the liver can also serve as substrate for the gluconeogenesis pathway and  
235 increase circulating glucose levels (31), which, together with the increased triglyceride levels, decreases  
236 overall glycemic control. The specific contribution of hepatic steatosis to whole body insulin sensitivity  
237 and dyslipidemia (32-35) is particularly significant for individuals diagnosed with the metabolic syndrome.  
238 However, the underlying molecular networks that are dysregulated by a HFr diet and precede insulin

239 resistance, NASH and NAFLD have not yet been identified, and the initial molecular abnormalities  
240 initiated by the exposure to fructose remain to be identified (6).

241

242 NHPs have been shown to be valuable models of diet-induced metabolic dysregulation due to extensive  
243 similarities with human metabolism (7). The ability to carefully control diet exposure, and the physiological  
244 similarity to humans make NHP an ideal model to examine molecular tissue and organ changes in  
245 response to short- and long-term dietary challenges. We used a cohort of vervet monkeys (*Chlorocebus*  
246 *aethiops sabeus*) fed an acute HFr diet (n=5) or chow diet (n=5) for 6 weeks. Previous analyses showed  
247 changes in liver enzymes, total plasma cholesterol, and liver histology indicative of liver injury with  
248 periportal and inflammatory lesions in the HFr group (6), but no other clinically discernable abnormalities  
249 in body mass, or circulating glucose levels. In this study, we used global untargeted transcriptomics,  
250 proteomics, and metabolomics of liver biopsy samples to identify the acute early hepatic molecular and  
251 cellular response to a HFr diet, prior to onset of fat accumulation or systemic pathophysiological changes,  
252 to identify dysregulated molecular networks that potentially drive fat accumulation, and may be the  
253 initiating steps for subsequent long-term liver dysregulation. Pathway and network analyses were  
254 performed on individual datasets and integrated multi-omics datasets to determine whether there was a  
255 gain in our understanding of the molecular impact of a HFr diet with a combined approach compared to  
256 use of single or double omics datasets. Our analytical approach included prioritization of molecules by  
257 using pathway and network enrichment statistics, with the stringent requirement of direct connections  
258 among molecules, to improve statistical rigor for this study with small sample sizes (a common limitation  
259 of NHP studies).

260

261 We chose to use IPA to assess integrated omics effectiveness since it has tools for canonical pathway  
262 enrichment, and the underlying knowledgebase provides a means for regulatory network analysis at high  
263 resolution using transcripts, proteins, and metabolites, which is not yet feasible with other publicly  
264 available tools such as DAVID Bioinformatic Resources (36). Our findings confirm previous papers

265 indicating the need for better tools to perform integrated omic analyses (26). In addition, it will be important  
266 to test strengths and limitations of multi-omics data integration with other tools when available.

267

268 In analyzing individual omics datasets, we identified a large number of statistically significant pathways  
269 for each data type, which is often the case for these types of data, making it a challenge to prioritize  
270 networks and distinguish likely true associations from spurious results. Integration of hepatic  
271 transcriptomic and proteomic data increased the significance of a number of pathways and networks,  
272 while decreasing the significance of other pathways, suggesting that truly associated pathways can be  
273 distinguished better with this approach. Interestingly, comparison of differentially expressed genes and  
274 proteins showed very little overlap: potentially due to the low correlation usually observed in expressed  
275 protein and transcript abundances. Most studies investigating proteome and transcriptome in the same  
276 model have noted this (e.g. (37)). However, integration of these datasets provided additional molecules  
277 with direct connections within a pathway or network, increasing the overall number of molecules,  
278 increasing the confidence in pathway or network prediction, and providing additional information about  
279 molecular functions. For some pathways and networks, additional differentially abundant molecules  
280 were added from the second omics dataset, creating new connections not evident in either of the  
281 individual omics datasets. Of note, proteins are often identified as molecules connecting separate  
282 regulatory networks and steps within signaling pathways, e.g. ATG3 in sirtuin signaling and FASN for  
283 the XBP1, PPARA and KLF15 networks.

284

285 Integration of transcriptomic and proteomic data increased the significance of the sirtuin signaling  
286 pathway, and revealed direct connections between sirtuin signaling and the four activated networks with  
287 predicted regulators PPARA, XBP1, MITF and KLF15. It is important to note that all of these genes were  
288 detected but not differentially expressed, but the encoded proteins were not detected. These results do  
289 not contradict the role of these proteins as central regulators since activity of all four depend on post-  
290 translational modifications (38-43).

291

292 Integration of metabolomic data with transcriptomic and proteomic datasets further improved significance  
293 of some pathways, with sirtuin signaling increasing in rank and statistics from being 7<sup>th</sup> for transcriptomics  
294 and 39<sup>th</sup> for proteomics, to becoming 2<sup>nd</sup> for transcriptomics and proteomics, and 2<sup>nd</sup> overall with  
295 integration of all 3 datatypes. This pathway included the most molecules, including 4 metabolites. Other  
296 pathways decreased in significance and rank compared with the analysis of individual omics datasets.  
297 Addition of metabolites also provided more direct connections among regulatory networks, and  
298 connected the sirtuin signaling pathway with the PPARA network. Metabolites aspartic acid and DHA  
299 also indicated end-of-pathway directionality for the sirtuin signaling pathway and the PPARA network.

300

301 Finally, integration of miRNA data showed 19 of 22 differentially expressed miRNAs targeted genes  
302 and/or proteins in the four activated networks and sirtuin signaling pathway with inverse expression  
303 profiles. Our miRNA findings suggest that the initial hepatic response to short-term exposure to a HFr  
304 diet is at least in part epigenetically regulated. Taken together, these results demonstrate that integration  
305 of transcriptomic, small transcriptomic, proteomic, and metabolomic data reveals pathways and networks  
306 central the HFr diet response in the liver, not seen by analysis of only one or two of these omic datasets.

307

308 Our results from these unique NHP biopsy samples reveal interesting novel molecular mechanisms  
309 regulating the initial hepatic response to HFr diet exposure in these animals. The sirtuin signaling pathway  
310 and networks regulated by PPARA, XBP1, MITF and KLF15 appear to be central to the HFr diet  
311 response. Both sirtuin signaling (44, 45) and PPARA (46) play important roles in the pathophysiology of  
312 NAFLD. For the sirtuin gene family, the majority of studies have focused on the role of SIRT1 in regulating  
313 both lipid and carbohydrate metabolism (47-49). Interestingly, in our study, SIRT2 rather than SIRT1 was  
314 central to the initial hepatic response to a HFr diet. A recent study in male mice showed that SIRT2  
315 functions as a negative regulator of NAFLD development and progression, with increased expression  
316 being protective when animals were fed a high-fat diet (50). Our study in female NHPs showed higher  
317 SIRT2 expression in the HFr group compared with chow-fed animals, and lower expression of GOT2 and

318 decreased abundance of aspartic acid (51), which is regulated by GOT2 (52, 53). In mice, quantification  
319 of GOT2 protein expression by immunohistochemistry shows decreased abundance with NAFLD (54),  
320 supporting our preliminary findings. GOT2 and aspartic acid are at the end of the sirtuin pathway and  
321 indicative of altered gluconeogenesis and pathologies associated with NAFLD.

322

323 While the overall pathways identified in our analysis are supported by published evidence in other model  
324 organisms and related pathophysiologies, we also raise additional questions about previously under- or  
325 unappreciated regulatory networks. Our analysis suggests that the HFr diet exposure led to activation of  
326 the PPARA network, and downstream molecules GOT2 and aspartic acid showed decreased abundance.  
327 Studies of PPARA liver expression in mice with steatosis in response to a high-fat diet show sex-  
328 differences: PPARA expression is increased in male rats, and FASN, which is directly downstream of  
329 PPARA, is also increased. However, in female rats, FASN is increased but PPARA is not (55), suggesting  
330 that hepatic PPARA activation/inhibition of FASN may be sex-specific, and the potentially divergent  
331 expression patterns in our female NHP in response to the HFr diet may be specific to female animals.

332

333 As another example, our detailed multi-omics analysis also suggested that DHA, an omega-3  
334 polyunsaturated fatty acid with anti-inflammatory functions (56), was lower in livers from animals fed a  
335 HFr diet than in livers from chow-fed animals. While no studies have reported changes in DHA in  
336 response to fructose, human studies examining dietary supplementation with DHA have suggested the  
337 beneficial effects of the increased level of DHA may include decreased incidence of NAFLD (57). DHA is  
338 known to bind and activate PPARA (58) which may influence sirtuin signaling and the integrated  
339 regulatory network we discovered in our analysis. The decreased abundance of DHA, but with predicted  
340 activation of PPARA and activation of all but GOT2 downstream of PPARA, like aspartic acid, suggests  
341 differences between rodents and primates or sex-differences in these signaling networks, and may point  
342 to other mechanisms (apart from DHA) by which PPARA expression may be increased by HFr.

343

344 GWAS of genes and proteins in sirtuin signaling and the four activated networks we identified show a  
345 single gene, FABP1, that has been reported to be associated with alanine aminotransferase levels, a  
346 marker of liver disease (59). Twelve additional genes were associated with lipoprotein-, insulin-, and BMI-  
347 related traits. Identification of SIRT2 and an integrated network of regulatory genes and proteins with  
348 altered abundance in livers from animals exposed to a HFr diet that are upstream of GOT2 and aspartic  
349 acid suggest that we have identified novel molecules and regulatory mechanisms that influence and  
350 potentially govern the initial hepatic response to short-term HFr diet exposure. Additional studies are  
351 required to validate our findings, and to explore potential targets by which these networks can be  
352 modulated to blunt the effects of fructose consumption on overall liver metabolism and function,  
353 preventing subsequent health complications known to occur with high intake levels.

354

## 355 **CONCLUSIONS**

356 We have demonstrated that integration of multiple omics datasets significantly improves prioritization of  
357 pathways and networks that influence hepatic response to a short-term HFr diet. Using this integrated  
358 approach, we identified sirtuin signaling and a large, integrated regulatory network, with molecules  
359 overlapping sirtuin signaling as a potential key modulator and regulator of hepatic metabolism in response  
360 to a HFr diet.

361

## 362 **MATERIALS AND METHODS**

### 363 **Animals and Experimental Design**

364 All experimental procedures involving vervet monkeys (*Chlorocebus sabaeus*) were approved and  
365 complied with the guidelines of the Institutional Animal Care and Use Committee of Wake Forest  
366 University Health Sciences, which is an AALAC accredited facility. Procedures were performed by a  
367 veterinarian (KK), including liver biopsy as previously described (27). Animals were provided non-  
368 steroidal anti-inflammatory and opioid analgesics during recovery as needed. Liver tissue was flash  
369 frozen in liquid nitrogen and stored at -80 C until analysis. Animal housing, handling, diet compositions  
370 (chow and HFr) and caloric details are as described elsewhere (6). Prior to the study, all animals were

371 maintained on chow diet. For this study, 10 female vervet monkeys were fed with either chow (n=5) or  
372 HF<sub>r</sub> (n=5) diets for 6 weeks. Previous studies have shown sex-specific metabolic responses to a HF<sub>r</sub> diet  
373 (7); for this reason, all animals in the study were female.

374

### 375 **Clinical Measures**

376 Serum-based clinical measures, including total protein, albumin, globulin, albumin/globulin ratio, AST,  
377 ALT, ALK phosphatase, GGTP, total bilirubin, urea nitrogen, creatinine, BUN/creatinine ratio,  
378 phosphorus, glucose, calcium, magnesium, sodium, potassium, Na/K ratio, chloride, cholesterol,  
379 triglycerides, amylase, lipase, CPK, and hematological parameters including WBC, RBC, hemoglobin,  
380 hematocrit, MCV, MCH, MCHC, blood parasites, platelet count, platelet, EST, neutrophils, bands,  
381 lymphocytes, monocytes, eosinophils and basophil data were obtained from ANTECH Diagnostics (800-  
382 872-1001, NC, USA).

383

### 384 **Transcriptomics: RNA Seq**

385 *RNA Extractions and Sequencing:* Total RNA was extracted from vervet monkey livers using the Zymo  
386 Direct-zol™ kit (Zymo Research) and each sample was subsequently quantified by Qubit assay  
387 (Thermo Fisher). RNA-Seq libraries were prepared from 500 ng of total RNA according to the Illumina  
388 TruSeq stranded mRNA protocol (Illumina), which specifically retains polyadenylated mRNAs by the  
389 oligo dT coated magnetic beads. Sequencing library concentrations were quantified using the KAPA  
390 library quantification kit (Kapa Biosystems). Clusters were generated by cBot (Illumina), and 2 × 100  
391 base paired-end sequencing libraries were sequenced using the Illumina HiSeq 2500 with v3  
392 sequencing reagents (Illumina).

393

394 *Data Analysis:* Raw sequences were de-multiplexed using the Illumina pipeline CASAVA v1.8. The  
395 FastQC and FASTX toolkit were used for QC. Sequence reads with Phred scores ≥ Q30 were retained.  
396 Reads aligned against the vervet reference genome (ChlSab1.1) were annotated using the Ensembl

397 release 93 gene model. Abundance analysis was performed using our established RNA-Seq workflow in  
398 Partek Flow, which allowed calculation of transcript-level expression of a gene's isoforms for alternative  
399 spliced transcripts (60, 61). Transcript abundances were quantified in Flow (Partek) using an expectation-  
400 maximization algorithm similar to the reported (62) which quantifies isoform expression levels across the  
401 whole genome at the same time and normalizes by transcript length to account for the transcript  
402 fragmentation step in RNA-Seq. Transcripts without read counts across all samples were filtered out, and  
403 then normalized by the trimmed mean of M values method [Robinson MD and Oshlack A. *Genome Biol.*  
404 11:R25, 2010] Differentially expressed genes were identified by Analysis of Variance (ANOVA;  
405 unadjusted  $p < 0.05$ ). Gene expression data were deposited in the National Center for Biotechnology  
406 Information's Gene Expression Omnibus (GEO; <http://www.ncbi.nlm.nih.gov/geo/>) - GEO Series  
407 accession number GSE176576.

408

#### 409 **Transcriptomics: small RNA Seq**

410 *Sequencing:* RNA extracted for RNA Seq was also used for small RNA Seq. Small RNA Seq methods  
411 are described in (63). Briefly, small RNA sequencing libraries were prepared using the Illumina TruSeq  
412 Small RNA Sample Prep Kit and were pooled after cDNA synthesis. cDNA libraries were clustered using  
413 an Illumina Cluster Station and sequenced with an Illumina GAIIx sequencer. Raw sequence reads were  
414 obtained using Illumina's Pipeline v1.5. Extracted sequence reads were normalized, annotated and  
415 abundance determined using mirDeep2 (64).

416

#### 417 *Data Analysis:*

418 Transcripts without read counts across all samples were filtered out, and then normalized by the trimmed  
419 mean of M values method. Differentially expressed genes identified by Analysis of Variance (ANOVA;  
420 unadjusted  $p < 0.05$ ). Gene expression data were deposited in the National Center for Biotechnology  
421 Information's Gene Expression Omnibus (GEO; <http://www.ncbi.nlm.nih.gov/geo/>) - GEO accession  
422 number GSE178269.



423

## 424 **Proteomics**

425 Proteomics data were generated by liquid chromatography-coupled tandem mass spectrometry using a  
426 Thermo Scientific Orbitrap Elite mass spectrometer. Details of sample preparation, mass spectral  
427 analysis, and data analysis using a proteogenomics approach in Morpheus were described previously  
428 (27).

429

### 430 *Data Analysis:*

431 For each animal, peptide spectrum intensities reported in Morpheus were summed across occurrences  
432 (i.e. across multiple transcript matches) based on Gene IDs. Proteins identified and quantified in at least  
433 3 animals per group (HF<sub>r</sub> and chow) retained for downstream analysis. Additionally, proteins that were  
434 quantified in all samples of one group but not in any of the samples of other group were also retained for  
435 subsequent analyses. Intensity values were log transformed, and missing data (at most 2 animals per  
436 group) were imputed using the NAGuideR tool with the impseq approach (sequential imputation)  
437 separately for the two experimental groups (HF<sub>r</sub> or chow).

438

### 439 *Comparison of gene and protein abundance:*

440 Gene lists (Additional file 3) and protein lists (Additional file 4) were uploaded into Venny and Venn  
441 diagrams were generated showing commonly expressed and differentially expressed genes and proteins  
442 (65). Ratios of HF<sub>r</sub> to chow were used to determine directionality.

443

## 444 **Metabolomics**

### 445 *GC-TOFMS Analysis*

446 Liver metabolites were analyzed with chemical derivatization following previously published protocols  
447 (66, 67). Extracted samples were spiked with two internal standard solutions (10  $\mu$ L of L-2-  
448 chlorophenylalanine in water, 0.3 mg/mL; 10  $\mu$ L of heptadecanoic acid in methanol, 1 mg/mL), mixed,  
449 and extracted with 300  $\mu$ L of methanol/chloroform (3:1). After centrifugation at 12 000g for 10 min, an

450 aliquot of the 300- $\mu$ L supernatant was transferred to a glass sampling vial to vacuum-dry at room  
451 temperature. The residue was derivatized using a two-step procedure. First, 80  $\mu$ L of methoxyamine (15  
452 mg/mL in pyridine) was added to the vial and kept at 30 °C for 90 min, followed by 80  $\mu$ L of BSTFA (1%  
453 TMCS) at 70 °C for 60 min.

454

455 Each 1- $\mu$ L aliquot of the derivatized solution was injected in splitless mode into an Agilent 6890N gas  
456 chromatograph coupled with a Pegasus HT time-of-flight mass spectrometer (Leco Corporation, St.  
457 Joseph, MI). The CRC and control samples were run in the order of “control-CRC-control”, alternately, to  
458 minimize systematic analytical deviations. Separation was achieved on a DB-5ms capillary column (30  
459 m  $\times$  250  $\mu$ m i.d., 0.25- $\mu$ m film thickness; (5%-phenyl)-methylpolysiloxane bonded and cross-linked;  
460 Agilent J&W Scientific, Folsom, CA), with helium as the carrier gas at a constant flow rate of 1.0 mL/min.  
461 The temperature of injection, transfer interface, and ion source was set to 270, 260, and 200 °C,  
462 respectively. The GC temperature programming was set to 2 min isothermal heating at 80 °C, followed  
463 by 10 °C/min oven temperature ramps to 180 °C, 5 °C/min to 240 °C, and 25 °C/min to 290 °C, and a  
464 final 9 min maintenance at 290 °C. Electron impact ionization (70 eV) at full scan mode ( $m/z$  30–600)  
465 was used, with an acquisition rate of 20 spectra/s in the TOFMS setting.

466

#### 467 *GC-TOFMS Data Analysis*

468 The acquired MS files from GC-TOFMS analysis were exported in NetCDF format by ChromaTOF  
469 software (v3.30, Leco Co., CA). CDF files were extracted using custom scripts (revised Matlab toolbox  
470 hierarchical multivariate curve resolution (H-MCR), developed (68, 69) in the MATLAB 7.0 (The  
471 MathWorks, Inc.) for data pretreatment procedures such as baseline correction, denoising, smoothing,  
472 alignment, time-window splitting, and multivariate curve resolution (based on multivariate curve resolution  
473 algorithm) (68). The resulting data set includes sample information, peak retention time and peak  
474 intensities. Compound identification was performed by comparing the mass fragments with National  
475 Institute of Standards and Technology (NIST) 05 Standard mass spectral databases in NIST MS search

476 2.0 (NIST, Gaithersburg, MD) software with a similarity of more than 70% and finally verified by available  
477 reference compounds.

478

#### 479 *2D GC-ToF-MS Analysis*

480 Gas chromatography-mass spectrometry was performed as described (70). Metabolite extracts were  
481 dried under vacuum in cold, and were then sequentially derivatized with methoxyamine hydrochloride  
482 (MeOX) and *N*-methyl-*N*-trimethylsilyl-trifluoroacetamide (MSTFA) (70). One microliter of the derivatized  
483 sample was injected in splitless mode using an autosampler (VCTS, Gerstel™, Linthicum, MD, USA) into  
484 a GC-MS system consisting of an Agilent® 7890 B gas chromatograph (Agilent Technologies, Palo Alto,  
485 CA, USA) with Pegasus® 4D ToF-MS instrument (LECO Corp., San Jose, CA, USA) equipped with an  
486 electron impact (EI) ionization source. Injection of the sample was performed at 250 °C with helium as a  
487 carrier gas and flow set to 2 mL min<sup>-1</sup>. GC was performed using a primary Rxi®-5Sil MS capillary column  
488 (Cat. No. 13623-6850, Restek, Bellefonte, PA, USA) (30 m × 0.25 mm × 0.25 µm) and a secondary  
489 Rtx®-17Sil capillary column (Cat. No. 40201-6850, Restek, Bellefonte, PA, USA). The temperature  
490 program started isothermal at 70 °C for 1 min followed by a 6 °C min<sup>-1</sup> ramp to 310 °C and a final 11 min  
491 hold at 310 °C. The system was then temperature-equilibrated at 70 °C for 5 min before the next injection.  
492 Mass spectra were collected at 20 scans/s with a range of *m/z* 40-600. The transfer line and the ion  
493 source temperatures were set to 280 °C. QC standards were injected at scheduled intervals for tentative  
494 identification and monitoring shifts in retention indices (RI).

495

#### 496 *2D GC-ToF-MS Data Analysis*

497 The GC-MS data were pre-processed, cleaned, aligned, and processed using ChromaToF version  
498 4.50.8.0 (LECO Corp., Michigan, USA) following settings from (71). Briefly described settings viz. S/N: 5;  
499 peak width: 0.15, base line offset: 1; *m/z* range: 50-800. The aligned data were also deconvoluted using  
500 Automated Mass Spectral Deconvolution and Identification System (AMDIS, NIST, USA) interface to  
501 match against the freely available MSRI spectral libraries of the Golm Metabolome Database available  
502 from Max-Planck-Institute for Plant Physiology, Golm, Germany (<http://csbdb.mpimp->

503 [golm.mpg.de/csbdb/gmd/gmd.html](http://golm.mpg.de/csbdb/gmd/gmd.html)) by matching the mass spectra and RI (72). Metabolites were  
504 identified by comparing fragmentation patterns available in both the Golm database as well as NIST Mass  
505 Spectral Reference Library (NIST11/2011; National Institute of Standards and Technology, USA) library.  
506 Peak finding and quantification of selective ion traces were accomplished using AMDIS software. Base  
507 peak areas of the mass fragments ( $m/z$ ) were normalized using median normalization and  $\log_2$   
508 transformation. Peak areas were normalized by dividing each peak area value by the area of the internal  
509 standard for a specific sample, and were further median normalized.

510  
511 *Liquid Chromatography-Time of Flight Mass Spectrometry (LC-TOFMS)*

512 Plasma samples were processed as reported before (73). A volume of 100  $\mu\text{L}$  supernatant was mixed  
513 with 400  $\mu\text{L}$  of a mixture of methanol and acetonitrile (5:3). Liver tissue homogenate was added to 500  
514  $\mu\text{L}$  of a chloroform, methanol, and water mixture (1:2:1, v/v/v). These samples were then mixed and  
515 centrifuged at 13,000 rpm for 10 min at 4°C. A 150  $\mu\text{L}$  aliquot of supernatant was transferred to a sampling  
516 vial. The deposit was re-homogenized with 500  $\mu\text{L}$  methanol followed by a second centrifugation. Another  
517 150  $\mu\text{L}$  supernatant was added to the same vial for drying and then reconstituted in 500  $\mu\text{L}$  of ACN: H<sub>2</sub>O  
518 (6:4, v/v) before separation.

519  
520 An Agilent HPLC 1200 system equipped with a binary solvent delivery manager and a sample manager  
521 (Agilent Corporation, Santa Clara, CA, USA) was used with chromatographic separations performed on  
522 a 4.6 × 150 mm 5  $\mu\text{m}$  Agilent ZORBAX Eclipse XDB-C18 chromatography column. The LC elution  
523 conditions are optimized as follows: isocratic at 1% B (0–0.5 min), linear gradient from 1% to 20% B (0.5–  
524 9.0 min), 20–75% B (9.0–15.0 min), 75–100% B (15.0–18.0 min), isocratic at 100% B (18–19.5 min);  
525 linear gradient from 100% to 1% B (19.5–20.0 min) and isocratic at 1% B (20.0–25.0 min). For positive  
526 ion mode (ESI+) where A = water with 0.1% formic acid and B = acetonitrile with 0.1% formic acid, while  
527 A = water and B = acetonitrile for negative ion mode (ESI–). The column was maintained at 30 °C as a 5  
528  $\mu\text{L}$  aliquot of sample is injected. Mass spectrometry is performed using an Agilent model 6220 MSD TOF  
529 mass spectrometer equipped with a dual sprayer electrospray ionization source (Agilent Corporation,

530 Santa Clara, CA, USA). The TOF mass spectrometer was operated with the following optimized  
531 conditions: (1) ES+ mode, capillary voltage 3500 V, nebulizer 45 psig, drying gas temperature 325 °C,  
532 drying gas flow 11 L/min, and (2) ES- mode, similar conditions as ES+ mode except the capillary voltage  
533 was adjusted to 3000 V. During metabolite profiling experiments, both plot and centroid data are acquired  
534 for each sample from 50 to 1,000 Da over a 25 min analysis time. Data generated from LC-TOFMS were  
535 centroided, deisotoped, and converted to mzData xml files using the MassHunter Qualitative Analysis  
536 Program (vB.03.01) (Agilent). Following conversion, xml files are analyzed using the open source XCMS  
537 package (v1.16.3) (<http://metlin.scripps.edu>), which runs in the statistical package R (v.2.9.2)  
538 (<http://www.r-project.org>), to pick, align, and quantify features (chromatographic events corresponding to  
539 specific m/z values and elution times). The software is used with default settings as described  
540 (<http://metlin.scripps.edu>) except for xset (bw = 5) and rector (plotype = "m", family = "s"). The created  
541 .tsv file is opened using Excel software and saved as .xls file. Compound identification was performed by  
542 comparing the accurate mass and retention time with reference standards available in our laboratory, or  
543 comparing the accurate mass with online database such as the Human Metabolome Database (HMDB).  
544 Metabolomic LC/GC-TOFMS data was analyzed using principle component analysis (PCA) and OPLS  
545 analysis between groups. The differential metabolites were selected when they meet the requirements  
546 of variable importance in the projection (VIP) >1 in OPLS model and  $p < 0.05$  from student *t*-test. The  
547 corresponding fold change shows how these selected differential metabolites varied from control. Final  
548 data analysis between control HFr-diet groups for each metabolite was conducted using independent *t*-  
549 test analysis with a  $p < 0.05$  significance threshold.

550

## 551 **Pathway and Network Analyses**

552 For individual omic datasets, all quality molecules for the dataset were uploaded to Ingenuity Pathway  
553 Analysis (IPA; QIAGEN). Gene symbols were used for genes and proteins, which are conserved between  
554 human and vervet. Pathway and network enrichment analyses used differentially abundant molecules  
555 and the IPA Knowledge Base, and requiring direct connections based on experimental evidence among  
556 differentially abundant molecules. Right-tailed Fisher's exact test was used to calculate enrichment of

557 differentially expressed genes in pathways,  $p < 0.01$ (61). Regulatory network prediction required previous  
558 experimental validation of direct connections in liver or liver cells.

559

## 560 **Integrated Omic Analyses**

561 Multi-omic data analysis combined the total gene, protein, and/or metabolite lists for all molecules that  
562 passed quality filters as appropriate for the data type. Lists included molecule ID, direction of change,  
563 fold change, and p-value. Pathway and network enrichment used the same parameters and statistical  
564 tests as for individual omic datasets, requiring experimentally validated direct connections for differentially  
565 abundant molecules.

566

## 567 **miRNA – Gene/Protein pairing**

568 Current pathway and network enrichment tools in IPA do not provide the means to filter direct connections  
569 based on inverse abundance between a miRNA and its target. In order to integrate our miRNA data, we  
570 performed miRNA – gene pairing in IPA for our miRNA, gene and protein datasets, requiring opposite  
571 expression for experimentally validated or highly predicted interactions (e.g., HFr miRNA up-regulated  
572 and HFr gene down-regulated compared with chow). Using the gene and protein IDs in this list, we  
573 merged it with the list of genes and proteins in all significantly enriched pathways and networks. This  
574 analysis does not provide the means to statistically evaluate the significance of miRNA addition to a given  
575 pathway or network; however, this approach provides evidence of an epigenetic component of the liver  
576 response to HFr diet.

577

## 578 **Identification of pathway and network genes previously associated with NASH/NAFLD related** 579 **traits**

580 The following search terms, with all variation of names in the GWAS catalog, were used to query the  
581 current GWAS catalog (74): alkaline phosphatase, aspartate aminotransferase, body mass index, body  
582 weight, fasting blood glucose, fasting blood insulin, fat body mass, fatty acid, glucose, HbA1c, HDL

583 cholesterol change, insulin, insulin resistance, insulin sensitivity, LDL cholesterol change, lipid, liver fat,  
584 liver disease biomarker, liver fibrosis, low density lipoprotein cholesterol, non-alcoholic fatty liver disease,  
585 non-alcoholic steatohepatitis, obesity, omega-3 polyunsaturated fatty acid, omega-6 polyunsaturated  
586 fatty acid, total cholesterol, triglyceride, type II diabetes mellitus, very low density lipoprotein cholesterol.  
587 Genes with associations, based on the GWAS catalog, to any of these traits were compared to the list of  
588 all differentially expressed miRNAs, genes and proteins from our transcriptomic and proteomic datasets,  
589 and compared with the genes in proteins in multi-omic significant networks and pathways.

590

## 591 **LIST OF ABBREVIATIONS**

592 **HFr:** high fructose

593 **PPARA:** peroxisome proliferator activated receptor alpha

594 **DHA:** docosahexaenoic acid

595 **NHP:** nonhuman primates

596 **NASH:** nonalcoholic steatohepatitis

597 **NAFLD:** nonalcoholic fatty liver disease

598 **GEO:** Gene Expression Omnibus

599 **H-MCR:** hierarchical multivariate curve resolution

600 **MeOX:** methoxyamine hydrochloride

601 **MSTFA:** N-methyl-N-trimethylsilyl-trifluoroacetamide

602 **EI:** electron impact

603 **RI:** retention indices

604 **AMDIS:** Automated Mass Spectral Deconvolution and Identification System

605 **NIST:** National Institute of Standards and Technology

606 **LC-TOFMS:** Liquid Chromatography-Time of Flight Mass Spectrometry

607 **HMDB:** Human Metabolome Database

608 **PCA:** principle component analysis

609 **VIP:** variable importance in the projection

610 **IPA: Ingenuity Pathway Analysis**

611

612

613 **DECLARATIONS**

614

615 Ethics approval and consent to participate: All experimental procedures involving vervet monkeys  
616 (*Chlorocebus sabaeus*) were approved and complied with the guidelines of the Institutional Animal Care  
617 and Use Committee of Wake Forest University Health Sciences, which is an AALAC accredited facility.  
618 Procedures were performed by a board-certified veterinarian employed by Wake Forest University Health  
619 Sciences.

620

621 Consent for publication: All authors have reviewed the manuscript and consent for publication.

622

623 Availability of data and materials: RNA Seq, proteomic, and metabolomic data are available in Additional  
624 files. Raw RNA Seq data are available through NCBI GEO Series accession number GSE176576 and  
625 small RNA Seq data are available through GEO accession number GSE178269.

626 To review GEO accession GSE178269 go to:

627 [https://urldefense.com/v3/\\_https://www.ncbi.nlm.nih.gov/geo/query/acc.cgi?acc=GSE178269\\_!!GA8](https://urldefense.com/v3/_https://www.ncbi.nlm.nih.gov/geo/query/acc.cgi?acc=GSE178269_!!GA8Xfdg!hpk17gHazQbLJ2Ux3leSzs9VDjsSSqkQ9zsGAAIMuyNtd_NsH2pPRYGKi1hk9Jw$)  
628 [Xfdg!hpk17gHazQbLJ2Ux3leSzs9VDjsSSqkQ9zsGAAIMuyNtd\\_NsH2pPRYGKi1hk9Jw\\$](https://urldefense.com/v3/_https://www.ncbi.nlm.nih.gov/geo/query/acc.cgi?acc=GSE178269_!!GA8Xfdg!hpk17gHazQbLJ2Ux3leSzs9VDjsSSqkQ9zsGAAIMuyNtd_NsH2pPRYGKi1hk9Jw$)

629 The following secure token has been created to allow review of record GSE178269 while it remains in  
630 private status: yryzskgcjrjfxav

631 To review GEO accession GSE176576 go to:

632 [https://urldefense.com/v3/\\_https://www.ncbi.nlm.nih.gov/geo/query/acc.cgi?acc=GSE176576\\_!!GA8](https://urldefense.com/v3/_https://www.ncbi.nlm.nih.gov/geo/query/acc.cgi?acc=GSE176576_!!GA8Xfdg!iPSaGb7UXXtZbc2VRI0Nj1cw9VE7rn_cFK62irhMe4UbjQs4vcXTLI31ISgLR38$)  
633 [Xfdg!iPSaGb7UXXtZbc2VRI0Nj1cw9VE7rn\\_cFK62irhMe4UbjQs4vcXTLI31ISgLR38\\$](https://urldefense.com/v3/_https://www.ncbi.nlm.nih.gov/geo/query/acc.cgi?acc=GSE176576_!!GA8Xfdg!iPSaGb7UXXtZbc2VRI0Nj1cw9VE7rn_cFK62irhMe4UbjQs4vcXTLI31ISgLR38$)

634 The following secure token has been created to allow review of record GSE178269 while it remains in  
635 private status: knsrqaodtoxjgz



636

637 Competing interests: VD currently is a Post-Doctoral researcher at NNRCISI; however, he did not receive  
638 any funding for this work.

639

640 Funding: The animal work was supported by grants to KK: UL1TR001420, P40OD010965, and  
641 K01AG033641; a portion of the analytical work was supported by grants to EQ: K01 AG056663, and  
642 GMK: K01 HL130697.

643

644 Authors' contributions: LAC, KK, and MO conceived the project. JPG, AJ, PR, GMK, LAC, JC, ZH, EQ,  
645 VD, and MO contributed to data generation and analyses. All authors read and approved the final  
646 manuscript.

647

648 Acknowledgements: We thank Biswapriya Misra for contributing to generation of metabolomics data.

649

## 650 **Supplementary Information**

651

### 652 **Additional file 1**

653 Pathway Summary for genes, proteins, metabolites, combined genes and proteins, combined genes,  
654 proteins, and metabolites, and combined genes, proteins, metabolites, and miRNAs.

655

### 656 **Additional file 2**

657 Network Summary for genes, proteins, metabolites, combined genes and proteins, combined genes,  
658 proteins, and metabolites, and combined genes, proteins, metabolites, and miRNAs.

659

### 660 **Additional file 3**

661 Gene List: Genes passing quality filters with ratios and p-values for HFr versus CON.

662

663 **Additional file 4**

664 Gene Pathways: Enrichment analysis of genes with p-value < 0.05.

665

666 **Additional file 5**

667 Gene Networks: Enrichment analysis of genes with p-value < 0.05.

668

669 **Additional file 6**

670 Protein List: Proteins passing quality filters with ratios and p-values for HFr versus CON.

671

672 **Additional file 7**

673 Protein Pathways: Enrichment analysis of proteins with p-value < 0.05.

674

675 **Additional file 8**

676 Protein Networks: Enrichment analysis of proteins with p-value < 0.05.

677

678 **Additional file 9**

679 Common Genes Proteins: List of common genes and proteins from Venney merge for all genes and  
680 proteins passing quality filters and for all differentially expressed genes and proteins.

681

682 **Additional file 10**

683 Metabolite List: Metabolites passing quality filters with ratios and p-values for HFr versus CON.

684

685 **Additional file 11**

686 Metabolite Pathways: Enrichment analysis of metabolites with p-value < 0.05.

687

688 **Additional file 12**

689 Metabolite Networks: Enrichment analysis of metabolites with p-value < 0.05.

690

691 **Additional file 13**

692 Gene & Pro Pathways: Enrichment analysis combining genes and proteins with p-value < 0.05.

693

694 **Additional file 14**

695 Gene & Pro Networks: Enrichment analysis combining genes and proteins with p-value < 0.05.

696

697 **Additional file 15**

698 Gene Pro Met Pathways: Enrichment analysis combining genes, proteins, and metabolites with p-value  
699 < 0.05.

700

701 **Additional file 16**

702 Gene Pro Met Networks: Enrichment analysis combining genes, proteins, and metabolites with p-value  
703 < 0.05.

704

705 **Additional file 17**

706 miRNA List: miRNAs passing quality filters and p-values < 0.05 for HFr versus CON.

707

708 **Additional file 18**

709 Gene-Pro with miRNA pairs: miRNA pairing with target genes and proteins either highly predicted or  
710 experimentally validated for differentially expressed miRNAs, genes and proteins for HFr versus CON (p-  
711 value <0.05).

712

713 **Additional file 19**

714 Diff Gene Pro GWAS: List of GWAS hits of differentially expressed genes and proteins for HFr versus  
715 CON.

716

**Table 1: Morphometric and Clinical Measures**

| Diet     | Age (years) | BW (Kg) | Waist (cm) | CRP (ng/ul) | SBP (mmHG) | DBP (mmHg) | INS (U/L) | HOMA (AU) | Glu (mg/dL) | TPC (mg/dL)  | TG (mg/dL) | AST (U/L) | ALT (U/L)    | ALP (U/L)    | GGTP (U/L)   | Liver TG (mg/ug prot) |
|----------|-------------|---------|------------|-------------|------------|------------|-----------|-----------|-------------|--------------|------------|-----------|--------------|--------------|--------------|-----------------------|
| CON      |             |         |            |             |            |            |           |           |             |              |            |           |              |              |              |                       |
| Mean     | 11.70       | 5.54    | 36.36      | 6.75        | 123.76     | 71.08      | 28.91     | 2.67      | 33.80       | 145.40       | 44.00      | 41.00     | 71.00        | 98.80        | 32.20        | 41.80                 |
| CON SD   | 6.42        | 0.78    | 4.34       | 4.26        | 26.17      | 16.43      | 14.30     | 2.02      | 18.85       | 23.14        | 9.14       | 11.40     | 54.99        | 27.26        | 8.14         | 14.99                 |
| HFr Mean | 15.70       | 5.44    | 36.46      | 14.63       | 100.08     | 65.80      | 41.93     | 9.08      | 73.80       | 220.60       | 75.60      | 65.40     | 286.20       | 147.80       | 84.00        | 43.80                 |
| HFr SD   | 5.62        | 1.46    | 9.56       | 11.70       | 9.46       | 13.13      | 16.79     | 10.88     | 61.34       | 62.56        | 65.58      | 26.10     | 115.47       | 27.09        | 38.76        | 25.72                 |
| p-value  | 0.325       | 0.894   | 0.984      | 0.195       | 0.094      | 0.590      | 0.223     | 0.231     | 0.201       | <b>0.036</b> | 0.317      | 0.092     | <b>0.006</b> | <b>0.021</b> | <b>0.019</b> | 0.884                 |

Abbreviations: SBP, systolic blood pressure; DBP, diastolic blood pressure; BW, body weight; CRP, C-reactive protein; INS, insulin; HOMA, homeostatic model assessment; Glu, glucose; TPC, total plasma cholesterol; TG, triglycerides; AST, aspartate transaminase; ALT, alanine aminotransferase; ALP, alkaline phosphatase; and GGTP, gamma-glutamyl transpeptidase.

**Table 2: Pathways for each omic data type and integrated omics data**

| Ingenuity<br>Canonical<br>Pathways                   | p-value       |               |            |                   |                               | Number of Molecules |         |            |                      |                               |                                            |
|------------------------------------------------------|---------------|---------------|------------|-------------------|-------------------------------|---------------------|---------|------------|----------------------|-------------------------------|--------------------------------------------|
|                                                      | Gene          | Protein       | Metabolite | Gene &<br>Protein | Gene, Protein<br>& Metabolite | Gene                | Protein | Metabolite | Gene<br>&<br>Protein | Gene, Protein<br>& Metabolite | Gene,<br>Protein,<br>Metabolite &<br>miRNA |
| Sirtuin<br>Signaling                                 | <b>0.0214</b> | <b>0.0182</b> | 0.0891     | <b>0.00021</b>    | <b>0.00014</b>                | 11                  | 5       | 4          | 19                   | 23                            | 26                                         |
| Remodeling of<br>Epithelial<br>Adherens<br>Junctions | <b>0.0087</b> | <b>0.0004</b> | -          | <b>0.00006</b>    | <b>0.00004</b>                | 5                   | 4       | -          | 9                    | 9                             | 11                                         |
| Necroptosis<br>Signaling                             | <b>0.0093</b> | 0.1959        | -          | <b>0.00759</b>    | <b>0.00603</b>                | 8                   | 2       | -          | 10                   | 10                            | 11                                         |
| Reg Cell<br>Mechanics by<br>Calpain<br>Protease      | 0.1600        | <b>0.0447</b> | -          | <b>0.00295</b>    | <b>0.00229</b>                | 3                   | 2       | -          | 7                    | 7                             | 7                                          |
| Integrin<br>Signaling                                | 0.3648        | <b>0.0001</b> | -          | <b>0.00363</b>    | <b>0.00229</b>                | 5                   | 7       | -          | 13                   | 13                            | 18                                         |
| Actin<br>Nucleation by<br>ARP-WASP<br>Complex        | -             | <b>0.0005</b> | -          | <b>0.00479</b>    | <b>0.00355</b>                | 1                   | 4       | -          | 7                    | 7                             | 7                                          |
| Paxillin<br>Signaling                                | 0.3258        | <b>0.0025</b> | -          | <b>0.00676</b>    | <b>0.00490</b>                | 3                   | 4       | -          | 8                    | 8                             | 12                                         |
| Protein<br>Ubiquitination                            | 0.2477        | <b>0.0001</b> | -          | <b>0.01148</b>    | <b>0.00813</b>                | 7                   | 8       | -          | 14                   | 14                            | 15                                         |
| Leukocyte<br>Extravasation<br>Signaling              | 0.2917        | <b>0.0037</b> | -          | <b>0.01148</b>    | <b>0.00955</b>                | 5                   | 5       | -          | 11                   | 11                            | 13                                         |
| Superpathway<br>of Cholesterol<br>Biosyn             | 0.4207        | <b>0.0004</b> | -          | <b>0.00617</b>    | 0.15704                       | 1                   | 3       | -          | 4                    | 4                             | 5                                          |
| Iron<br>homeostasis<br>signaling                     | <b>0.0011</b> | 0.5105        | -          | <b>0.00912</b>    | <b>0.01202</b>                | 9                   | 1       | -          | 9                    | 9                             | 11                                         |
| Stearate<br>Biosynthesis I                           | 0.0631        | 0.0257        | -          | <b>0.00832</b>    | <b>0.01820</b>                | 3                   | 2       | -          | 5                    | 5                             | 6                                          |
| Cell Cycle<br>Control of<br>Chromosomal<br>Rep       | <b>0.0038</b> | -             | -          | <b>0.01445</b>    | <b>0.01148</b>                | 5                   | -       | -          | 5                    | 5                             | 8                                          |
| Cholesterol<br>Biosyn                                | -             | <b>0.0020</b> | -          | <b>0.04266</b>    | 0.25293                       | -                   | 2       | -          | 2                    | 2                             | 3                                          |
| Zymosterol<br>Biosyn                                 | -             | <b>0.0014</b> | -          | <b>0.00933</b>    | 0.09772                       | -                   | 2       | -          | 2                    | 2                             | 3                                          |

**Table 3: Regulatory Networks for each omic data type and integrated omics data**

| Upstream Regulator | Molecule Type           | Pred. Act. State | p-value      |         |            |                 |                            | Number of Molecules |                |                            |                                   |
|--------------------|-------------------------|------------------|--------------|---------|------------|-----------------|----------------------------|---------------------|----------------|----------------------------|-----------------------------------|
|                    |                         |                  | Gene         | Protein | Metabolite | Gene & Protein  | Gene, Protein & Metabolite | Gene                | Gene & Protein | Gene, Protein & Metabolite | Gene, Protein, Metabolite & miRNA |
| PPARA              | ligand-dep nuclear rec  | Activated        | <b>0.032</b> | -       | -          | <b>5.64E-03</b> | <b>3.04E-03</b>            | 16                  | 23             | 25                         | 27                                |
| XBP1               | transcription regulator | Activated        | 0.071        | -       | -          | <b>0.018</b>    | <b>0.012</b>               | 9                   | 13             | 13                         | 14                                |
| MITF               | transcription regulator | Activated        | -            | -       | -          | <b>4.64E-04</b> | <b>2.53E-04</b>            | 0                   | 17             | 17                         | 23                                |
| KLF15              | transcription regulator | Activated        | -            | -       | -          | <b>9.66E-04</b> | <b>7.33E-04</b>            | 0                   | 6              | 6                          | 6                                 |
| HDAC1              | transcription regulator | Inhibited        | -            | -       | -          | <b>0.029</b>    | <b>0.020</b>               | 0                   | 13             | 13                         | 16                                |

**Table 4: Pathway and Network Genes and Proteins with GWAS SNPs**

| <b>Gene Symbol</b> | <b>Pathway or Network</b>                                                                                             | <b>Trait</b>                                                                                  |
|--------------------|-----------------------------------------------------------------------------------------------------------------------|-----------------------------------------------------------------------------------------------|
| APOA1              | HDAC1 Network<br>PPARA Network<br>XBP1 Network                                                                        | Very low-density lipoprotein cholesterol                                                      |
| ATG7               | KLF15 Network<br>Sirtuin Signaling Pathway                                                                            | Fat body mass                                                                                 |
| CLIP1              | Remodeling of Epithelial Adherens Junctions                                                                           | Body mass index                                                                               |
| FABP1              | HDAC1 Network<br>PPARA Network                                                                                        | Non-alcoholic fatty liver disease<br>Hepatic fibrosis                                         |
| GOT2               | Sirtuin Signaling Pathway                                                                                             | Triglycerides<br>Aspartate aminotransferase                                                   |
| MET                | MITF Network<br>Remodeling of Epithelial Adherens Junctions                                                           | Triglycerides                                                                                 |
| MITF               | MITF Network                                                                                                          | Low-density lipoprotein cholesterol<br>Triglycerides                                          |
| PNPLA2             | PPARA Network                                                                                                         | Body fat distribution                                                                         |
| PPARA              | PPARA Network                                                                                                         | Type II Diabetes<br>Total cholesterol<br>Low-density lipoprotein cholesterol<br>Triglycerides |
| RAC1               | Actin Nucleation by ARP-WASP Complex<br>Integrin Signaling<br>Leukocyte Extravasation Signaling<br>Paxillin Signaling | Low-density lipoprotein cholesterol                                                           |
| RAP1GAP            | Leukocyte Extravasation Signaling                                                                                     | Alkaline phosphatase                                                                          |
| SORT1              | MITF Network                                                                                                          | Type II Diabetes<br>Coronary artery disease<br>LDL cholesterol change                         |
| TNFRSF11B          | Necroptosis Signaling Pathway                                                                                         | Alkaline phosphatase                                                                          |

Figure 1: Venn diagram showing common A) expressed and B) differentially expressed genes and proteins.

A.

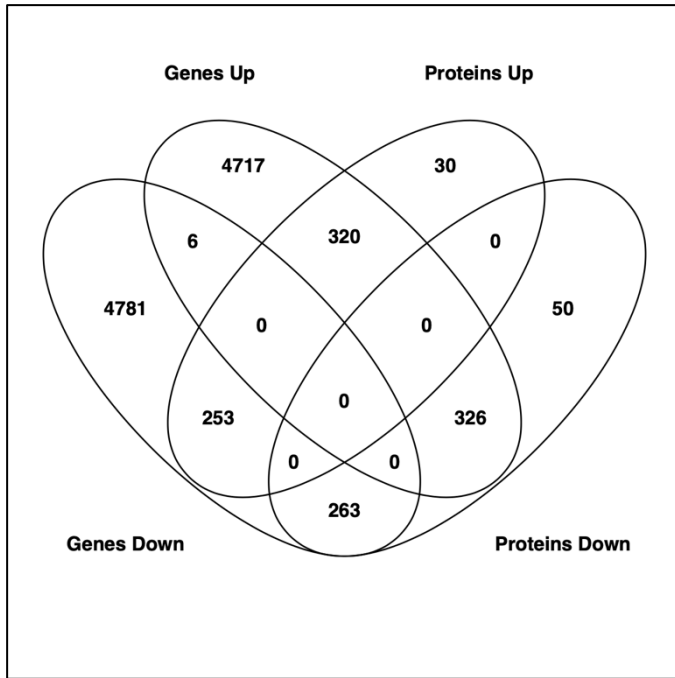

B.

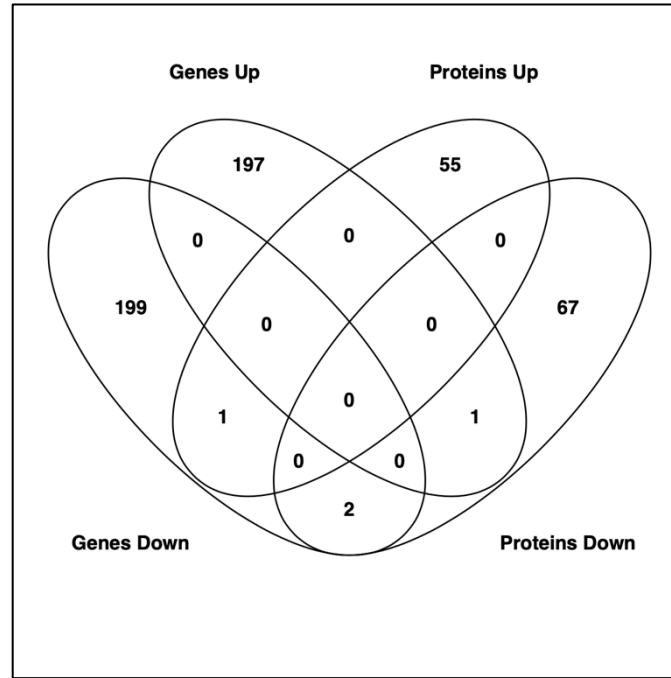



Figure 2: Regulatory network up-regulated in HF<sub>r</sub> livers compared with chow. Red fill indicates increased abundance, green fill decreased abundance, light orange fill indicates predicted activation, green outline genes, blue outline proteins, gray outline miRNAs, purple outline metabolites, green lines indicate inhibition and red lines activation.

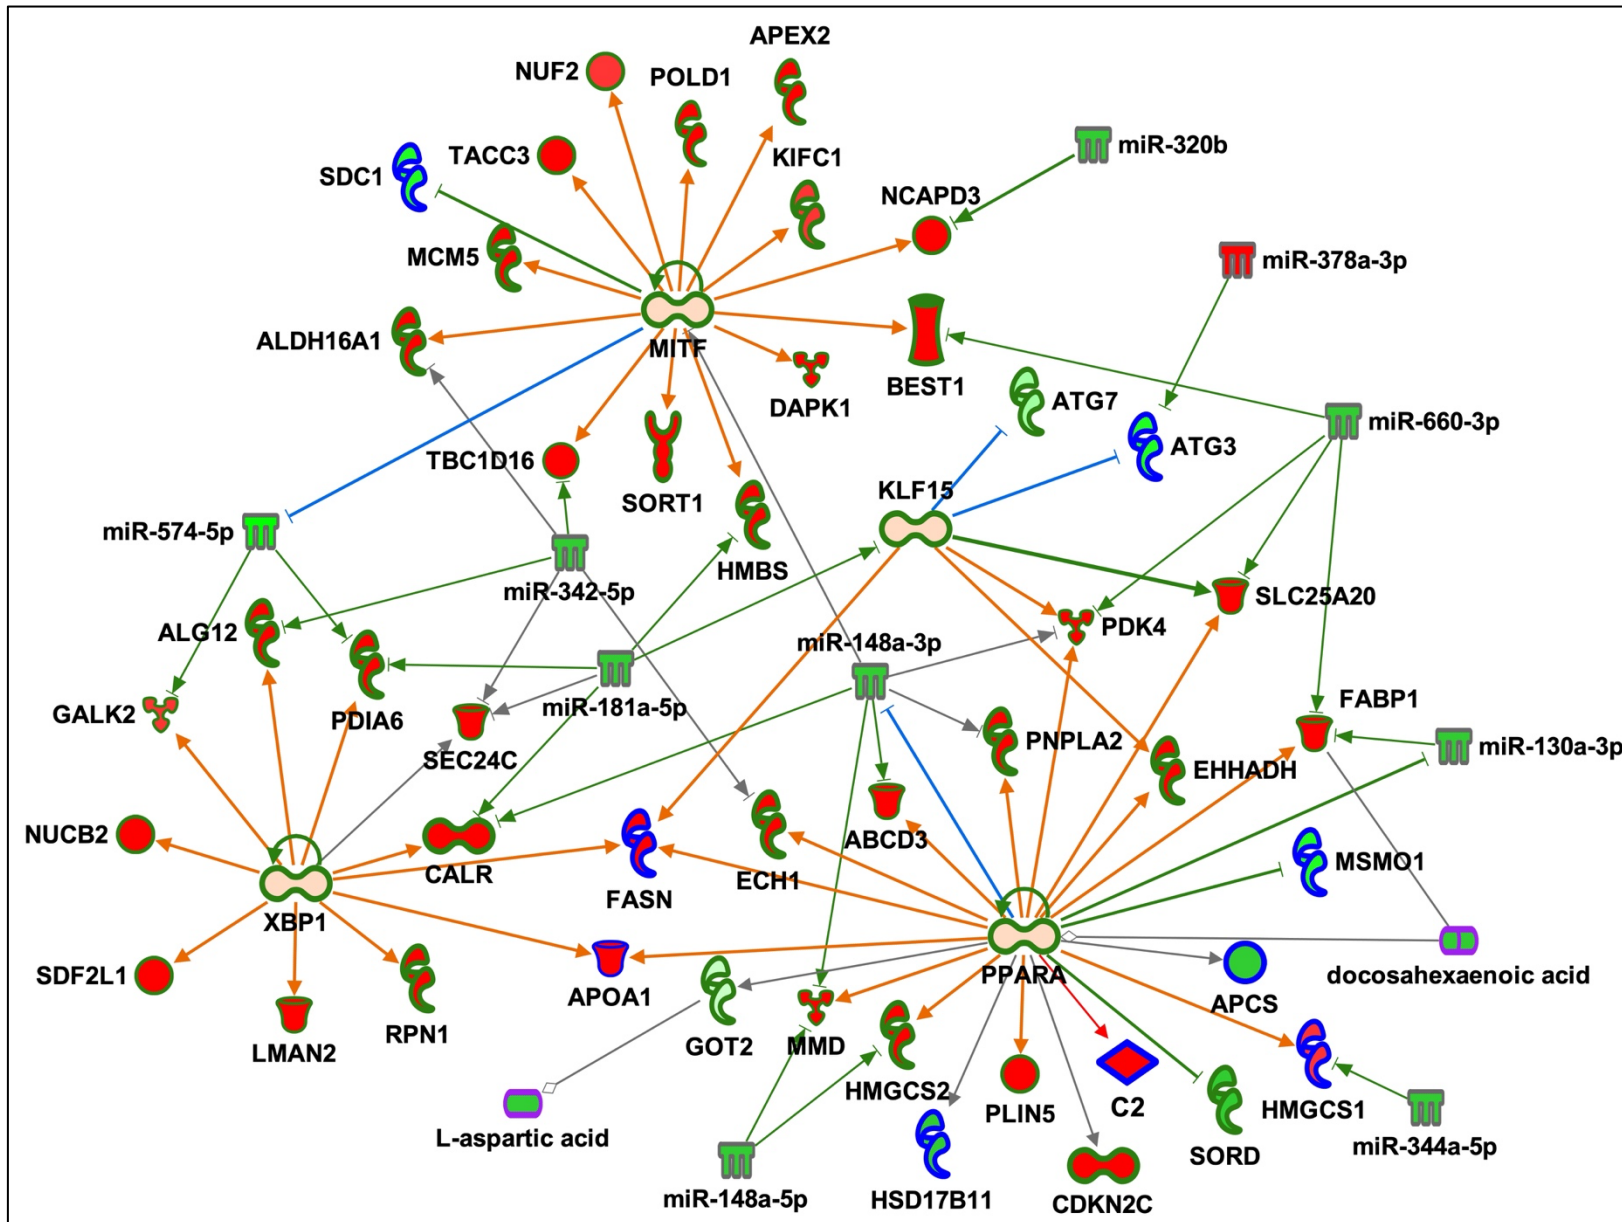

717

718 **References**

- 719 1. Elliott SS, Keim NL, Stern JS, Teff K, Havel PJ. Fructose, weight gain, and the insulin resistance  
720 syndrome. *Am J Clin Nutr.* 2002;76(5):911-22.
- 721 2. Havel PJ. Dietary fructose: implications for dysregulation of energy homeostasis and  
722 lipid/carbohydrate metabolism. *Nutr Rev.* 2005;63(5):133-57.
- 723 3. Softic S, Gupta MK, Wang GX, Fujisaka S, O'Neill BT, Rao TN, et al. Divergent effects of glucose  
724 and fructose on hepatic lipogenesis and insulin signaling. *J Clin Invest.* 2017;127(11):4059-74.
- 725 4. Teff KL, Elliott SS, Tschop M, Kieffer TJ, Rader D, Heiman M, et al. Dietary fructose reduces  
726 circulating insulin and leptin, attenuates postprandial suppression of ghrelin, and increases  
727 triglycerides in women. *J Clin Endocrinol Metab.* 2004;89(6):2963-72.
- 728 5. Stanhope KL, Havel PJ. Endocrine and metabolic effects of consuming beverages sweetened with  
729 fructose, glucose, sucrose, or high-fructose corn syrup. *Am J Clin Nutr.* 2008;88(6):1733S-7S.
- 730 6. Kavanagh K, Wylie AT, Tucker KL, Hamp TJ, Gharaibeh RZ, Fodor AA, et al. Dietary fructose  
731 induces endotoxemia and hepatic injury in calorically controlled primates. *Am J Clin Nutr.*  
732 2013;98(2):349-57.
- 733 7. Bremer AA, Stanhope KL, Graham JL, Cummings BP, Wang W, Saville BR, et al. Fructose-fed  
734 rhesus monkeys: a nonhuman primate model of insulin resistance, metabolic syndrome, and type  
735 2 diabetes. *Clin Transl Sci.* 2011;4(4):243-52.
- 736 8. Blevins JE, Graham JL, Morton GJ, Bales KL, Schwartz MW, Baskin DG, et al. Chronic oxytocin  
737 administration inhibits food intake, increases energy expenditure, and produces weight loss in  
738 fructose-fed obese rhesus monkeys. *Am J Physiol Regul Integr Comp Physiol.* 2015;308(5):R431-  
739 8.
- 740 9. Suzuki M, Yamamoto D, Suzuki T, Fujii M, Suzuki N, Fujishiro M, et al. High fat and high fructose  
741 diet induced intracranial atherosclerosis and enhanced vasoconstrictor responses in non-human  
742 primate. *Life Sci.* 2006;80(3):200-4.

- 743 10. Cydylo MA, Davis AT, Kavanagh K. Fatty liver promotes fibrosis in monkeys consuming high  
744 fructose. *Obesity* (Silver Spring). 2017;25(2):290-3.
- 745 11. Frye BM, Craft S, Latimer CS, Keene CD, Montine TJ, Register TC, et al. Aging-related Alzheimer's  
746 disease-like neuropathology and functional decline in captive vervet monkeys (*Chlorocebus*  
747 *aethiops sabaues*). *Am J Primatol*. 2021:e23260.
- 748 12. Chen JA, Fears SC, Jasinska AJ, Huang A, Al-Sharif NB, Scheibel KE, et al. Neurodegenerative  
749 disease biomarkers Abeta1-40, Abeta1-42, tau, and p-tau181 in the vervet monkey cerebrospinal  
750 fluid: Relation to normal aging, genetic influences, and cerebral amyloid angiopathy. *Brain Behav*.  
751 2018;8(2):e00903.
- 752 13. Kalinin S, Willard SL, Shively CA, Kaplan JR, Register TC, Jorgensen MJ, et al. Development of  
753 amyloid burden in African Green monkeys. *Neurobiology of aging*. 2013;34(10):2361-9.
- 754 14. Latimer CS, Shively CA, Keene CD, Jorgensen MJ, Andrews RN, Register TC, et al. A nonhuman  
755 primate model of early Alzheimer's disease pathologic change: Implications for disease  
756 pathogenesis. *Alzheimers Dement*. 2018.
- 757 15. Postupna N, Latimer CS, Larson EB, Sherfield E, Paladin J, Shively CA, et al. Human striatal  
758 dopaminergic and regional serotonergic synaptic degeneration with lewy body disease and  
759 inheritance of APOE epsilon4. *Am J Pathol*. 2017;187(4):884-95.
- 760 16. Kavanagh K, Davis AT, Peters DE, LeGrand AC, Bharadwaj MS, Molina AJ. Regulators of  
761 mitochondrial quality control differ in subcutaneous fat of metabolically healthy and unhealthy  
762 obese monkeys. *Obesity*. 2017;25(4):689-96.
- 763 17. Kavanagh K, Fairbanks LA, Bailey JN, Jorgensen MJ, Wilson M, Zhang L, et al. Characterization  
764 and heritability of obesity and associated risk factors in vervet monkeys. *Obesity*. 2007;15(7):1666-  
765 74.
- 766 18. Wilson QN, Wells M, Davis AT, Sherrill C, Tsilimigras MCB, Jones RB, et al. Greater microbial  
767 translocation and vulnerability to metabolic disease in healthy aged female monkeys. *Sci Rep*.  
768 2018;8(1):11373.

- 769 19. Jorgensen MJ, Rudel LL, Nudy M, Kaplan JR, Clarkson TB, Pajewski NM, et al. 25(OH)D3 and  
770 cardiovascular risk factors in female nonhuman primates. *J Womens Health (Larchmt)*.  
771 2012;21(9):959-65.
- 772 20. Jorgensen MJ, Aycock ST, Clarkson TB, Kaplan JR. Effects of a Western-type diet on plasma  
773 lipids and other cardiometabolic risk factors in African green monkeys (*Chlorocebus aethiops*  
774 *sabaeus*). *J Am Assoc Lab Anim Sci*. 2013;52(4):448-53.
- 775 21. Jasinska AJ, Zelaya I, Service SK, Peterson CB, Cantor RM, Choi OW, et al. Genetic variation and  
776 gene expression across multiple tissues and developmental stages in a nonhuman primate. *Nat*  
777 *Genet*. 2017;49(12):1714-21.
- 778 22. Schmitt CA, Service SK, Jasinska AJ, Dyer TD, Jorgensen MJ, Cantor RM, et al. Obesity and  
779 obesogenic growth are both highly heritable and modified by diet in a nonhuman primate model,  
780 the African green monkey (*Chlorocebus aethiops sabaeus*). *International journal of obesity (2005)*.  
781 2018;42(4):765-74.
- 782 23. Warren WC, Jasinska AJ, Garcia-Perez R, Svardal H, Tomlinson C, Rocchi M, et al. The genome  
783 of the vervet (*Chlorocebus aethiops sabaeus*). *Genome Res*. 2015;25(12):1921-33.
- 784 24. Kavanagh K, Wylie AT, Chavanne TJ, Jorgensen MJ, Voruganti VS, Comuzzie AG, et al. Aging  
785 does not reduce heat shock protein 70 in the absence of chronic insulin resistance. *J Gerontol A*  
786 *Biol Sci Med Sci*. 2012;67(10):1014-21.
- 787 25. Voruganti VS, Jorgensen MJ, Kaplan JR, Kavanagh K, Rudel LL, Temel R, et al. Significant  
788 genotype by diet (G x D) interaction effects on cardiometabolic responses to a pedigree-wide,  
789 dietary challenge in vervet monkeys (*Chlorocebus aethiops sabaeus*). *Am J Primatol*.  
790 2013;75(5):491-9.
- 791 26. Misra BB, Langefeld CD, Olivier M, Cox LA. Integrated Omics: Tools, advances, and future  
792 approaches. *J Mol Endocrinol*. 2018.
- 793 27. Proffitt JM, Glenn J, Cesnik AJ, Jadhav A, Shortreed MR, Smith LM, et al. Proteomics in non-  
794 human primates: utilizing RNA-Seq data to improve protein identification by mass spectrometry in  
795 vervet monkeys. *BMC Genomics*. 2017;18(1):877.

- 796 28. Lecoultre V, Egli L, Carrel G, Theytaz F, Kreis R, Schneiter P, et al. Effects of fructose and glucose  
797 overfeeding on hepatic insulin sensitivity and intrahepatic lipids in healthy humans. *Obesity* (Silver  
798 Spring). 2013;21(4):782-5.
- 799 29. Cohen JC, Horton JD, Hobbs HH. Human fatty liver disease: old questions and new insights.  
800 *Science*. 2011;332(6037):1519-23.
- 801 30. Libby P, Ridker PM, Hansson GK. Progress and challenges in translating the biology of  
802 atherosclerosis. *Nature*. 2011;473(7347):317-25.
- 803 31. Rizkalla SW. Health implications of fructose consumption: A review of recent data. *Nutr Metab*  
804 (Lond). 2010;7:82.
- 805 32. Nguyen-Duy TB, Nichaman MZ, Church TS, Blair SN, Ross R. Visceral fat and liver fat are  
806 independent predictors of metabolic risk factors in men. *Am J Physiol Endocrinol Metab*.  
807 2003;284(6):E1065-71.
- 808 33. Fabbrini E, Magkos F, Mohammed BS, Pietka T, Abumrad NA, Patterson BW, et al. Intrahepatic  
809 fat, not visceral fat, is linked with metabolic complications of obesity. *Proc Natl Acad Sci U S A*.  
810 2009;106(36):15430-5.
- 811 34. Fabbrini E, Magkos F, Mohammed BS, Pietka T, Abumrad NA, Patterson BW, et al. Intrahepatic  
812 fat, not visceral fat, is linked with metabolic complications of obesity. *P Natl Acad Sci USA*.  
813 2009;106(36):15430-5.
- 814 35. Nguyen-Duy TB, Nichaman MZ, Church TS, Blair SN, Ross R. Visceral fat and liver fat are  
815 independent predictors of metabolic risk factors in men. *Am J Physiol-Endoc M*.  
816 2003;284(6):E1065-E71.
- 817 36. Jiao X, Sherman BT, Huang da W, Stephens R, Baseler MW, Lane HC, et al. DAVID-WS: a stateful  
818 web service to facilitate gene/protein list analysis. *Bioinformatics*. 2012;28(13):1805-6.
- 819 37. Bekker-Jensen DB, Kelstrup CD, Batth TS, Larsen SC, Haldrup C, Bramsen JB, et al. An optimized  
820 shotgun strategy for the rapid generation of comprehensive human proteomes. *Cell Syst*.  
821 2017;4(6):587-99 e4.

- 822 38. Sacco F, Humphrey SJ, Cox J, Mischnik M, Schulte A, Klabunde T, et al. Glucose-regulated and  
823 drug-perturbed phosphoproteome reveals molecular mechanisms controlling insulin secretion. *Nat*  
824 *Commun.* 2016;7:13250.
- 825 39. Wood P, Mulay V, Darabi M, Chan KC, Heeren J, Pol A, et al. Ras/mitogen-activated protein kinase  
826 (MAPK) signaling modulates protein stability and cell surface expression of scavenger receptor  
827 SR-BI. *J Biol Chem.* 2011;286(26):23077-92.
- 828 40. Wang FM, Chen YJ, Ouyang HJ. Regulation of unfolded protein response modulator XBP1s by  
829 acetylation and deacetylation. *Biochem J.* 2011;433(1):245-52.
- 830 41. Regazzetti C, Sormani L, Debayle D, Bernerd F, Tulic MK, De Donatis GM, et al. Melanocytes  
831 sense blue light and regulate pigmentation through opsin-3. *J Invest Dermatol.* 2018;138(1):171-  
832 8.
- 833 42. Wu M, Hemesath TJ, Takemoto CM, Horstmann MA, Wells AG, Price ER, et al. c-Kit triggers dual  
834 phosphorylations, which couple activation and degradation of the essential melanocyte factor Mi.  
835 *Genes Dev.* 2000;14(3):301-12.
- 836 43. Takeda K, Takemoto C, Kobayashi I, Watanabe A, Nobukuni Y, Fisher DE, et al. Ser298 of MITF,  
837 a mutation site in Waardenburg syndrome type 2, is a phosphorylation site with functional  
838 significance. *Hum Mol Genet.* 2000;9(1):125-32.
- 839 44. Ding S, Jiang J, Zhang G, Bu Y, Zhang G, Zhao X. Resveratrol and caloric restriction prevent  
840 hepatic steatosis by regulating SIRT1-autophagy pathway and alleviating endoplasmic reticulum  
841 stress in high-fat diet-fed rats. *PLoS One.* 2017;12(8):e0183541.
- 842 45. Nassir F, Ibdah JA. Sirtuins and nonalcoholic fatty liver disease. *World J Gastroenterol.*  
843 2016;22(46):10084-92.
- 844 46. Regnier M, Polizzi A, Smati S, Lukowicz C, Fougerat A, Lippi Y, et al. Hepatocyte-specific deletion  
845 of Pparalpha promotes NAFLD in the context of obesity. *Sci Rep.* 2020;10(1):6489.
- 846 47. Colak Y, Yesil A, Mutlu HH, Caklili OT, Ulasoglu C, Senates E, et al. A potential treatment of non-  
847 alcoholic fatty liver disease with SIRT1 activators. *J Gastrointestin Liver Dis.* 2014;23(3):311-9.



- 848 48. Tobita T, Guzman-Lepe J, Takeishi K, Nakao T, Wang Y, Meng F, et al. SIRT1 disruption in human  
849 fetal hepatocytes leads to increased accumulation of glucose and lipids. *PLoS One*.  
850 2016;11(2):e0149344.
- 851 49. Bruce KD, Szczepankiewicz D, Sihota KK, Ravindraanandan M, Thomas H, Lillycrop KA, et al.  
852 Altered cellular redox status, sirtuin abundance and clock gene expression in a mouse model of  
853 developmentally primed NASH. *Biochim Biophys Acta*. 2016;1861(7):584-93.
- 854 50. Ren H, Hu F, Wang D, Kang X, Feng X, Zhang L, et al. SIRT2 Prevents Liver Steatosis and  
855 Metabolic Disorders via Deacetylation of HNF4alpha. *Hepatology*. 2021.
- 856 51. Xie Z, Li H, Wang K, Lin J, Wang Q, Zhao G, et al. Analysis of transcriptome and metabolome  
857 profiles alterations in fatty liver induced by high-fat diet in rat. *Metabolism*. 2010;59(4):554-60.
- 858 52. DeLorenzo RJ, Ruddle FH. Glutamate oxalate transaminase (GOT) genetics in *Mus musculus*:  
859 linkage, polymorphism, and phenotypes of the *Got-2* and *Got-1* loci. *Biochem Genet*.  
860 1970;4(2):259-73.
- 861 53. Schiele F, Artur Y, Varasteh A, Wellman M, Siest G. Serum mitochondrial aspartate  
862 aminotransferase activity: not useful as a marker of excessive alcohol consumption in an  
863 unselected population. *Clin Chem*. 1989;35(6):926-30.
- 864 54. Sookoian S, Castano GO, Scian R, Fernandez Gianotti T, Dopazo H, Rohr C, et al. Serum  
865 aminotransferases in nonalcoholic fatty liver disease are a signature of liver metabolic  
866 perturbations at the amino acid and Krebs cycle level. *Am J Clin Nutr*. 2016;103(2):422-34.
- 867 55. Dong Q, Kuefner MS, Deng X, Bridges D, Park EA, Elam MB, et al. Sex-specific differences in  
868 hepatic steatosis in obese spontaneously hypertensive (SHROB) rats. *Biol Sex Differ*.  
869 2018;9(1):40.
- 870 56. Xue B, Yang Z, Wang X, Shi H. Omega-3 polyunsaturated fatty acids antagonize macrophage  
871 inflammation via activation of AMPK/SIRT1 pathway. *PLoS One*. 2012;7(10):e45990.
- 872 57. Hodson L, Bhatia L, Scorletti E, Smith DE, Jackson NC, Shojaee-Moradie F, et al.  
873 Docosahexaenoic acid enrichment in NAFLD is associated with improvements in hepatic  
874 metabolism and hepatic insulin sensitivity: a pilot study. *Eur J Clin Nutr*. 2017;71(8):973-9.

- 875 58. Popeijus HE, van Otterdijk SD, van der Krieken SE, Konings M, Serbonij K, Plat J, et al. Fatty acid  
876 chain length and saturation influences PPARalpha transcriptional activation and repression in  
877 HepG2 cells. *Mol Nutr Food Res*. 2014;58(12):2342-9.
- 878 59. Chen VL, Du X, Chen Y, Kuppa A, Handelman SK, Vohnoutka RB, et al. Genome-wide association  
879 study of serum liver enzymes implicates diverse metabolic and liver pathology. *Nat Commun*.  
880 2021;12(1):816.
- 881 60. Karere GM, Glenn JP, VandeBerg JL, Cox LA. Differential microRNA response to a high-  
882 cholesterol, high-fat diet in livers of low and high LDL-C baboons. *BMC Genomics*. 2012;13:320.
- 883 61. Spradling KD, Glenn JP, Garcia R, Shade RE, Cox LA. The baboon kidney transcriptome: analysis  
884 of transcript sequence, splice variants, and abundance. *PLoS One*. 2013;8(4):e57563.
- 885 62. Xing Y, Yu T, Wu YN, Roy M, Kim J, Lee C. An expectation-maximization algorithm for probabilistic  
886 reconstructions of full-length isoforms from splice graphs. *Nucleic Acids Res*. 2006;34(10):3150-  
887 60.
- 888 63. Puppala S, Li C, Glenn JP, Saxena R, Gawrieh S, Quinn A, et al. Primate fetal hepatic responses  
889 to maternal obesity: epigenetic signalling pathways and lipid accumulation. *J Physiol*.  
890 2018;596(23):5823-37.
- 891 64. Friedlander MR, Chen W, Adamidi C, Maaskola J, Einspanier R, Knespel S, et al. Discovering  
892 microRNAs from deep sequencing data using miRDeep. *Nat Biotechnol*. 2008;26(4):407-15.
- 893 65. Oliveros JC. Venny. An interactive tool for comparing lists with Venn's diagrams. 2015 [Available  
894 from: <https://bioinfogp.cnb.csic.es/tools/venny/index.html>].
- 895 66. Bao Y, Zhao T, Wang X, Qiu Y, Su M, Jia W, et al. Metabonomic variations in the drug-treated  
896 type 2 diabetes mellitus patients and healthy volunteers. *J Proteome Res*. 2009;8(4):1623-30.
- 897 67. Qiu Y, Cai G, Su M, Chen T, Zheng X, Xu Y, et al. Serum metabolite profiling of human colorectal  
898 cancer using GC-TOFMS and UPLC-QTOFMS. *J Proteome Res*. 2009;8(10):4844-50.
- 899 68. Jonsson P, Johansson AI, Gullberg J, Trygg J, A J, Grung B, et al. High-throughput data analysis  
900 for detecting and identifying differences between samples in GC/MS-based metabolomic analyses.  
901 *Anal Chem*. 2005;77(17):5635-42.



- 902 69. Jonsson P, Gullberg J, Nordstrom A, Kusano M, Kowalczyk M, Sjostrom M, et al. A strategy for  
903 identifying differences in large series of metabolomic samples analyzed by GC/MS. *Anal Chem.*  
904 2004;76(6):1738-45.
- 905 70. Lisec J, Schauer N, Kopka J, Willmitzer L, Fernie AR. Gas chromatography mass spectrometry-  
906 based metabolite profiling in plants. *Nat Protoc.* 2006;1(1):387-96.
- 907 71. Winnike JH, Wei X, Knagge KJ, Colman SD, Gregory SG, Zhang X. Comparison of GC-MS and  
908 GCxGC-MS in the analysis of human serum samples for biomarker discovery. *J Proteome Res.*  
909 2015;14(4):1810-7.
- 910 72. Kopka J, Schauer N, Krueger S, Birkemeyer C, Usadel B, Bergmuller E, et al. GMD@CSB.DB: the  
911 Golm Metabolome Database. *Bioinformatics.* 2005;21(8):1635-8.
- 912 73. Fordahl S, Cooney P, Qiu Y, Xie G, Jia W, Erikson KM. Waterborne manganese exposure alters  
913 plasma, brain, and liver metabolites accompanied by changes in stereotypic behaviors.  
914 *Neurotoxicol Teratol.* 2012;34(1):27-36.
- 915 74. Buniello A, MacArthur JAL, Cerezo M, Harris LW, Hayhurst J, Malangone C, et al. The NHGRI-  
916 EBI GWAS Catalog of published genome-wide association studies, targeted arrays and summary  
917 statistics 2019. *Nucleic Acids Res.* 2019;47(D1):D1005-D12.

918
